# Supplementary material for: Identification of yeast α-glucosidase inhibitors from Pueraria lobata by ligand fishing based on magnetic mesoporous silicon combined with knock-out/knock-in technology
Source: Royal Society of Chemistry journal article supplement (doi:10.1039/d2fo03475a), 2023-01-01
Supplement: d2fo03475a1.pdf [file d2fo03475a1.pdf]

## Supporting information

### **Identification of yeast $\alpha$ -glucosidase inhibitors from *Pueraria lobata* by ligand fishing based on magnetic mesoporous silicon combined with knock-out/knock-in technology**

Jinfang Xu<sup>†</sup>, Zhiyu Fan<sup>†</sup>, Gangqiang Yang, Yanan Yang, Xinjie Wu, Tongtong Li, Qili Wang, Jianping Gao\*

School of Pharmaceutical Science, Shanxi Medical University, 56 Xinjian Road, Taiyuan 030001, People's Republic of China

<sup>†</sup> Authors contributed equally to this work

#### **\* Correspondence**

***Dr. Jianping Gao***

School of Pharmaceutical Science, Shanxi Medical University,  
56 Xinjian Road, Taiyuan 030001,  
People's Republic of China

E-mail: jpgao123@163.com; Tel.: +86-0351-398-5244

## Contents

|                                                                                                |    |
|------------------------------------------------------------------------------------------------|----|
| <b>Fig. 1S.</b> Standard curve of Allura red (peak area-concentration) .....                   | 3  |
| <b>Fig. 2S.</b> Mass spectrometry of compound 1 .....                                          | 4  |
| <b>Fig. 3S.</b> Mass spectrometry of compound 2 .....                                          | 5  |
| <b>Fig. 4S.</b> Mass spectrometry of compound 3 .....                                          | 6  |
| <b>Fig. 5S.</b> Mass spectrometry of compound 4 .....                                          | 7  |
| <b>Fig. 6S.</b> Mass spectrometry of compound 5 .....                                          | 8  |
| <b>Fig. 7S.</b> Mass spectrometry of compound 6 .....                                          | 9  |
| <b>Fig. 8S.</b> Mass spectrometry of compound 7 .....                                          | 10 |
| <b>Fig. 9S.</b> Mass spectrometry of compound 8 .....                                          | 11 |
| <b>Fig. 10S.</b> Mass spectrometry of compound 9 .....                                         | 12 |
| <b>Fig. 11S.</b> Mass spectrometry of compound 10 .....                                        | 13 |
| <b>Table. 1S.</b> Molecular docking analysis of the 10 ligands with $\alpha$ -glucosidase..... | 14 |

**Fig. 1S.** Standard curve of Allura red (peak area-concentration)

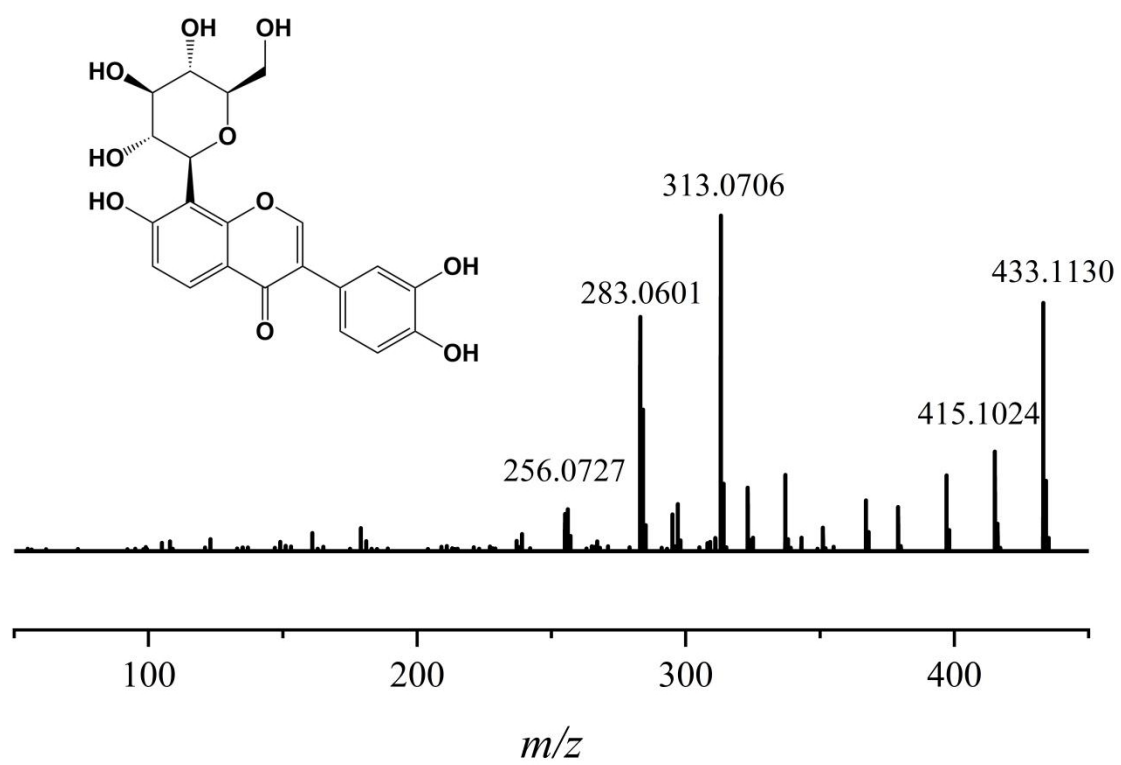

Fig. 2S. Mass spectrometry of compound 1

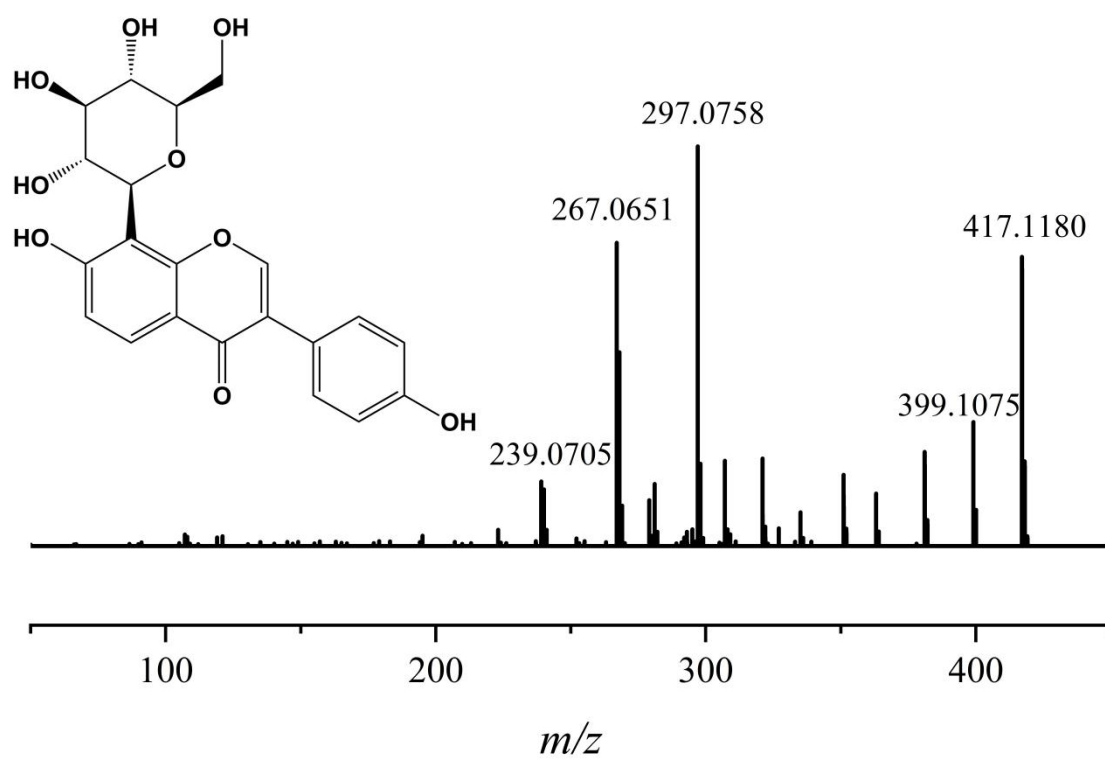

**Fig. 3S.** Mass spectrometry of compound 2

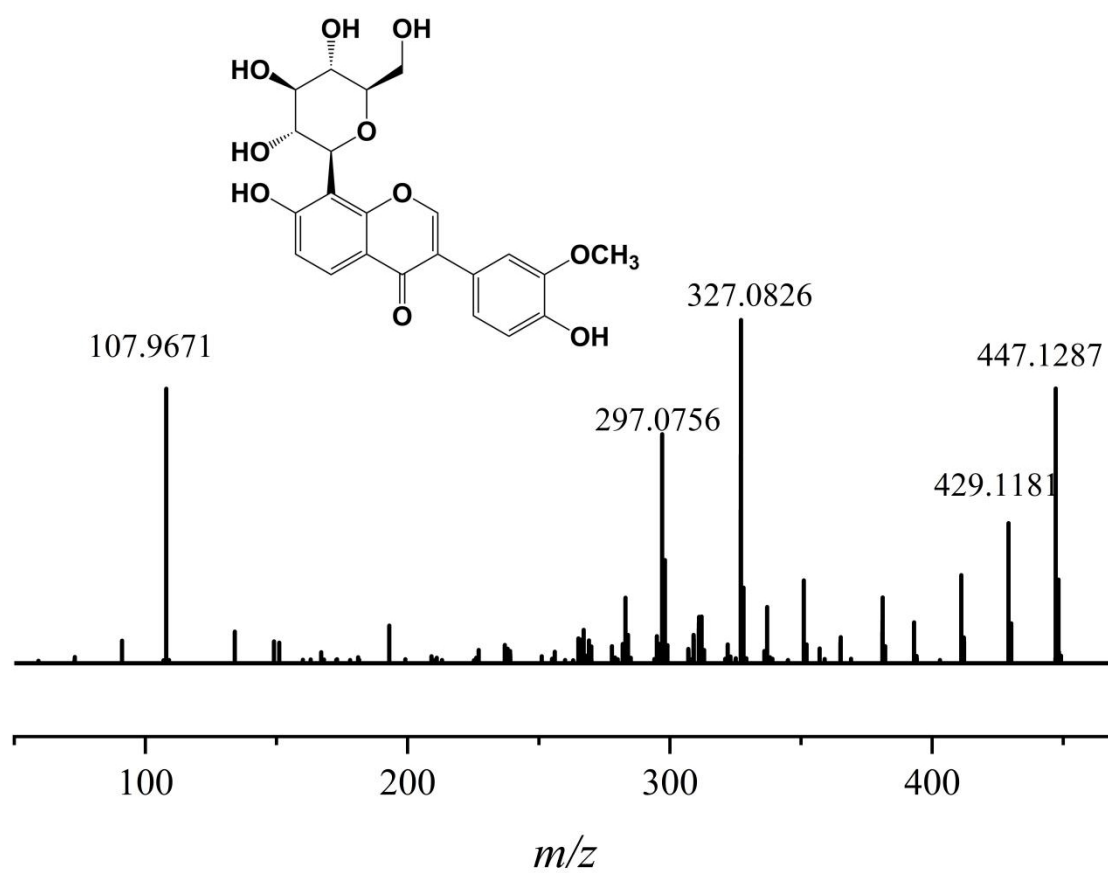

**Fig. 4S.** Mass spectrometry of compound 3

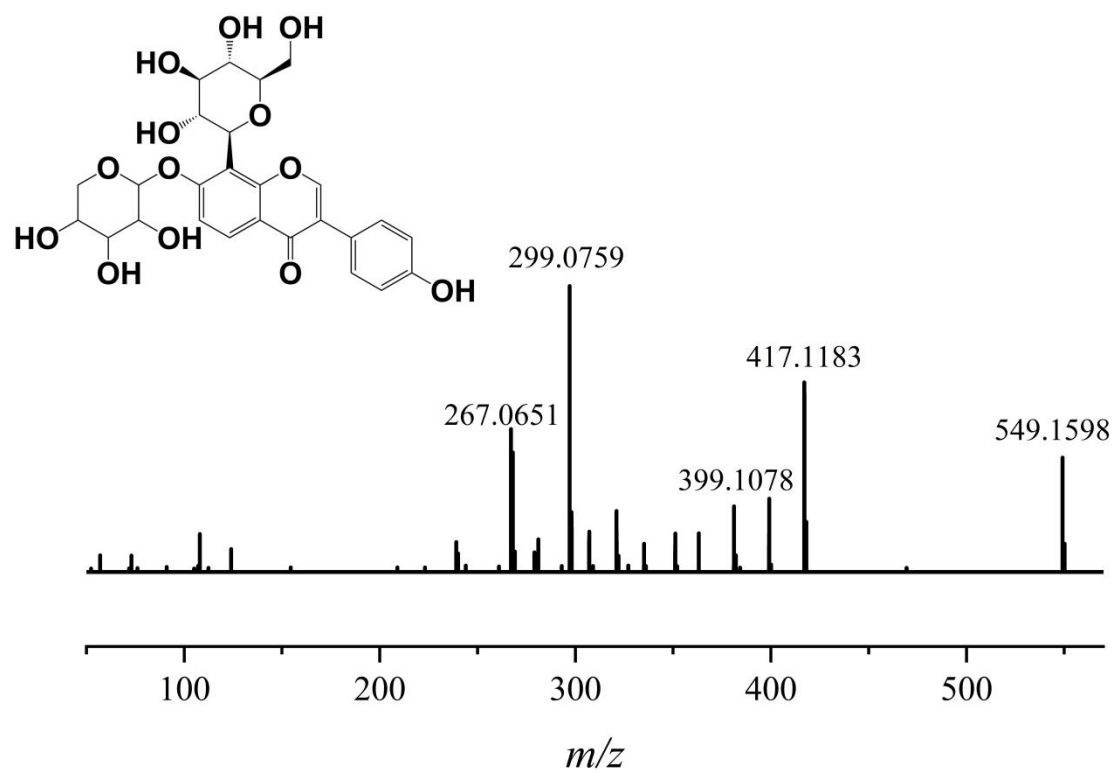

**Fig. 5S.** Mass spectrometry of compound 4

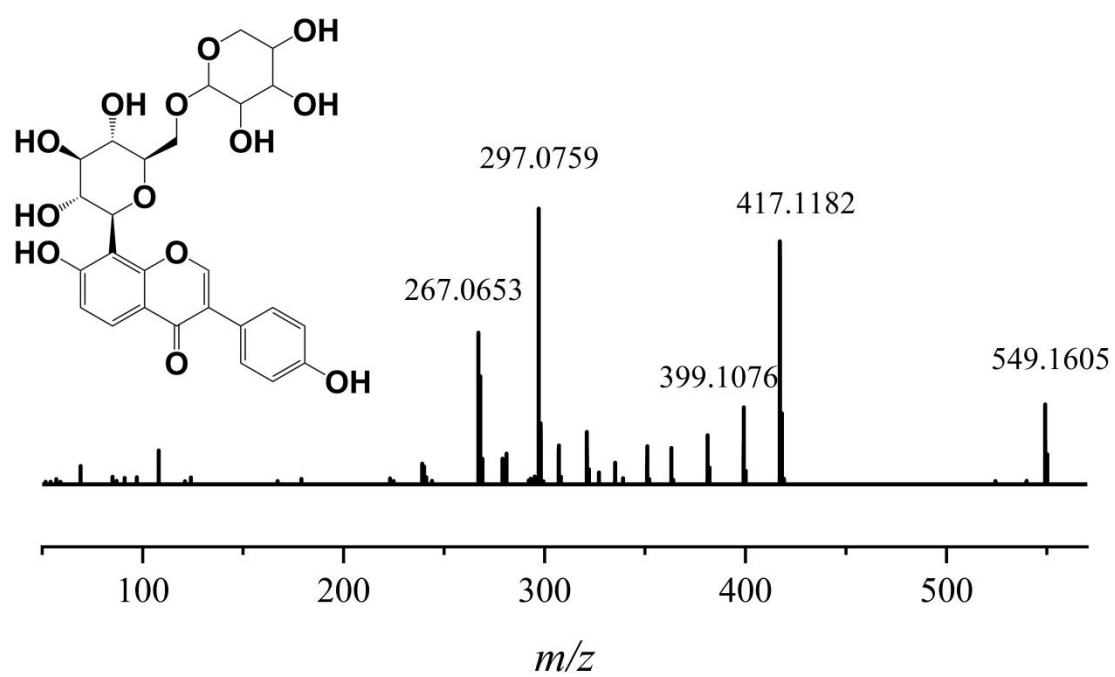

**Fig. 6S.** Mass spectrometry of compound 5



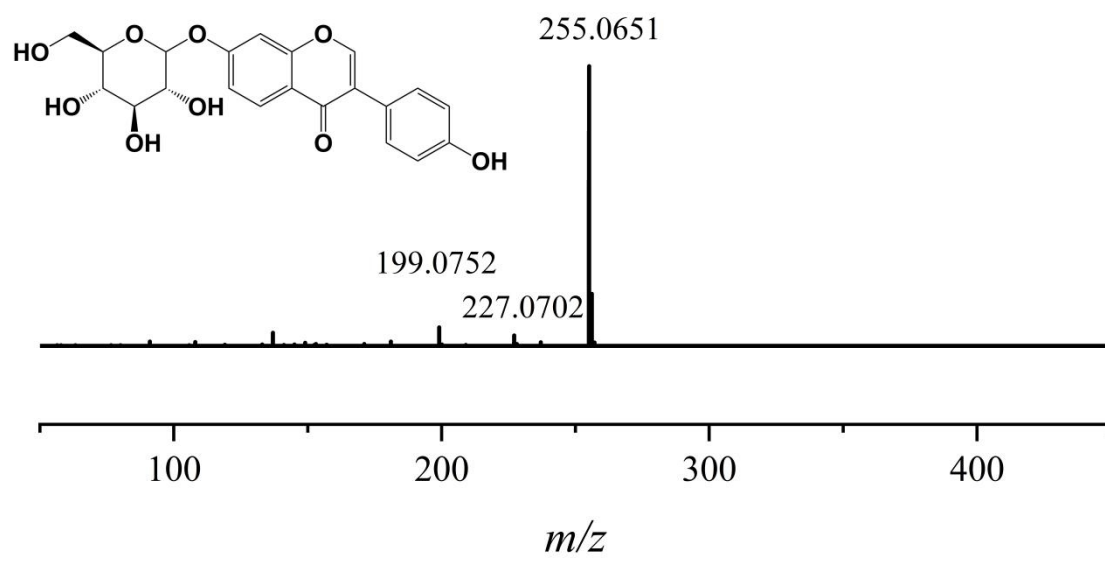

**Fig. 7S.** Mass spectrometry of compound 6

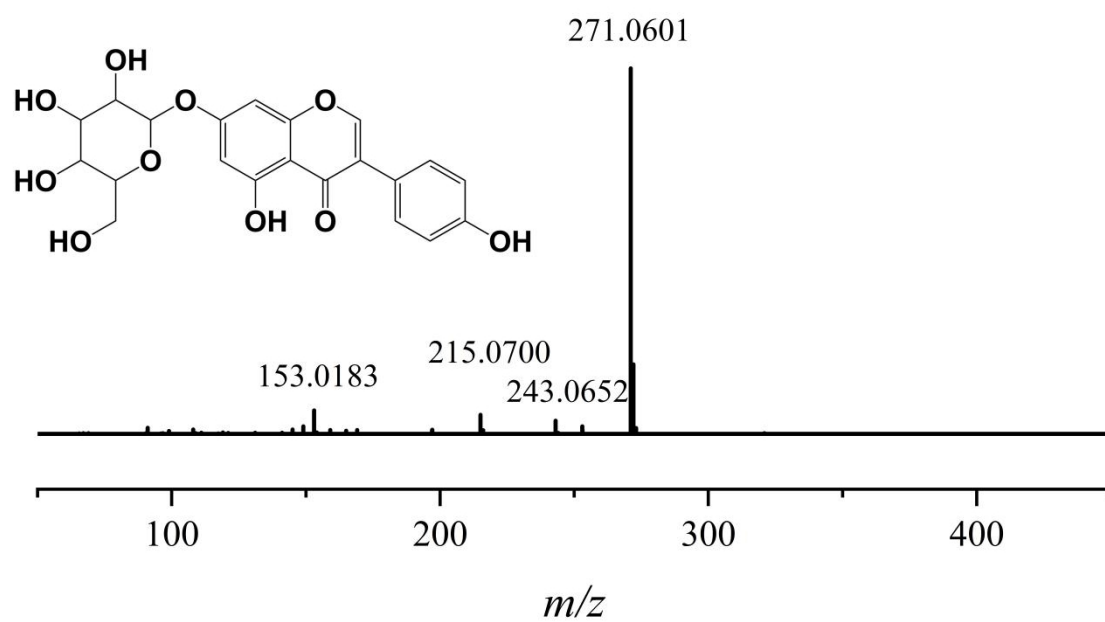

**Fig. 8S.** Mass spectrometry of compound 7

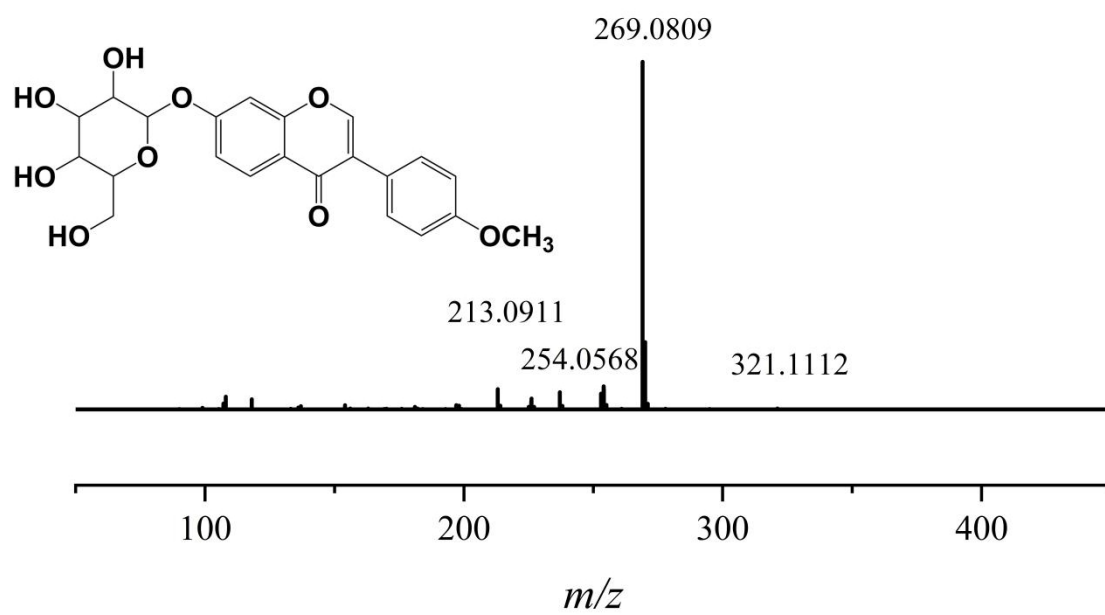

**Fig. 9S.** Mass spectrometry of compound 8

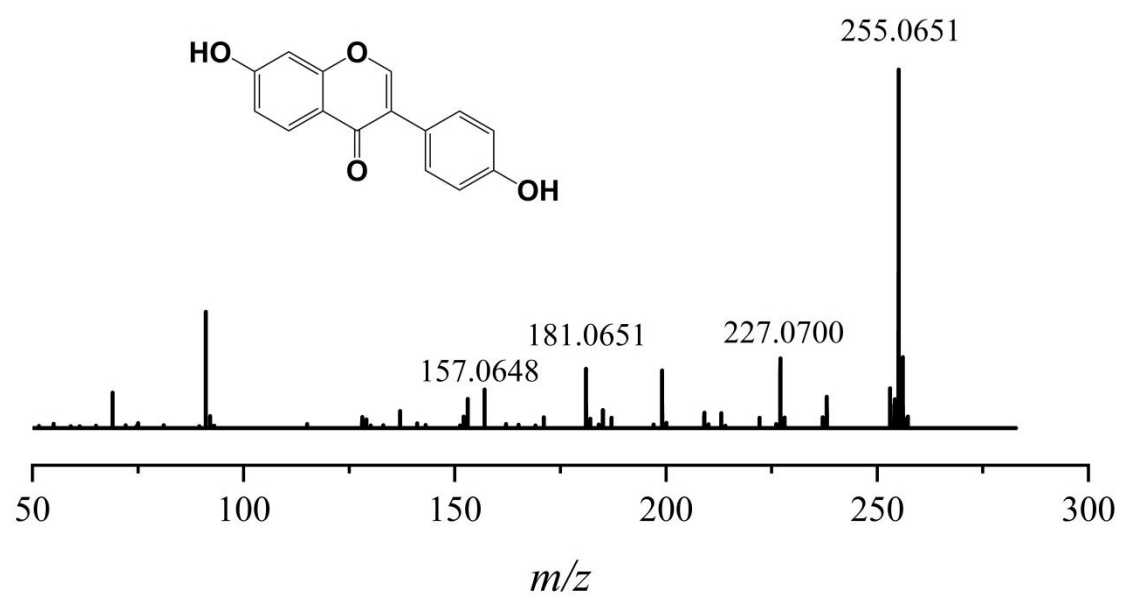

**Fig. 10S.** Mass spectrometry of compound 9

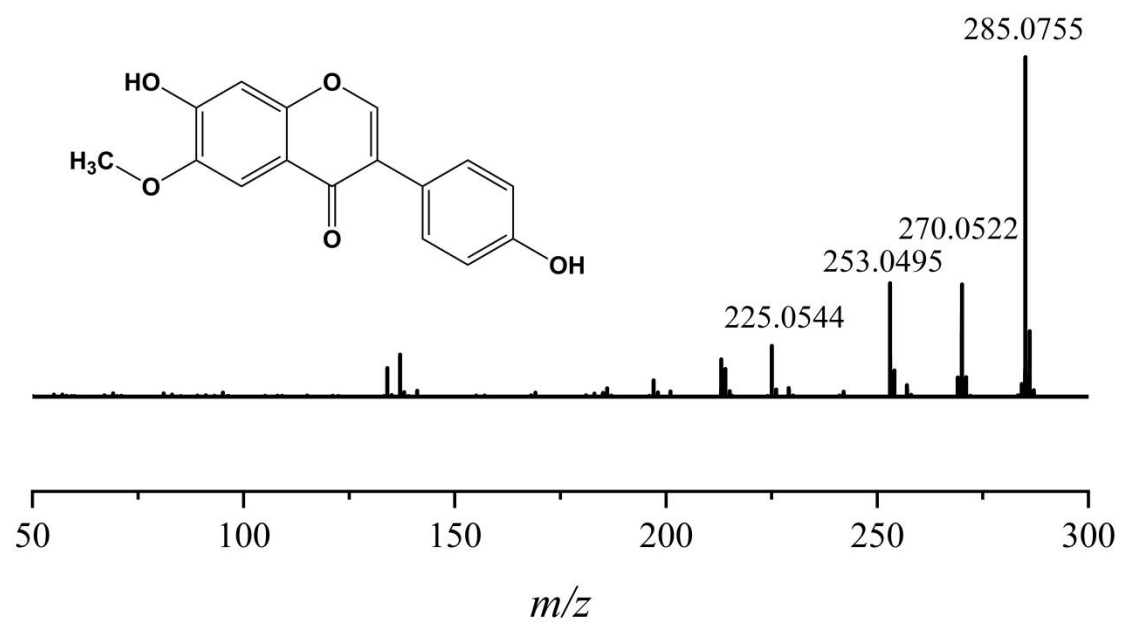

**Fig. 11S.** Mass spectrometry of compound 10

**Table. 1S.** Molecular docking analysis of the 10 ligands with  $\alpha$ -glucosidase

| <b>Compound number</b> | <b>Total Score</b> | <b>Hydrogen bonding associated amino acid residues</b>  |
|------------------------|--------------------|---------------------------------------------------------|
| 1                      | 5.3938             | Asp307 Gln279 Tyr158 Asp352 Asp215 Asp213               |
| 2                      | 5.8709             | Asp307 Gln279 Ser241 Lys156 Glu411 Asr442               |
| 3                      | 3.5659             | Asp307 Ser311 Arg315 Lys156 Ser241 Asp242 His280 Glu277 |
| 4                      | 4.5122             | Asp307 Glu279 Asp215 Arg442                             |
| 5                      | 4.4246             | Arg315 Ser241 Glu411 Arg442 Asp352 His112 Asp69         |
| 6                      | 7.7858             | Asp307 Arg442 Asp325 Gln279 Glu277                      |
| 7                      | 7.3186             | Glu411 Pro312 Asp242 Gln279 Asp215                      |
| 8                      | 6.6854             | Arg213 Glu277 Gln279 His351 Asp352 Arg442               |
| 9                      | 5.3531             | Asp307 Thr310 Arg315 Ser241 Lys156                      |
| 10                     | 5.4960             | Asp307 Gln353 Arg442 Asp215                             |
